# Supplementary material for: Identification of Circulating Serum miRNAs as Novel Biomarkers in Pancreatic Cancer Using a Penalized Algorithm
Source: PubMed Central journal article supplement (PMC7863930; doi:10.3390/ijms22031007), 2021-01-20
Supplement: ijms-22-01007-s001.pdf [file ijms-22-01007-s001.pdf]

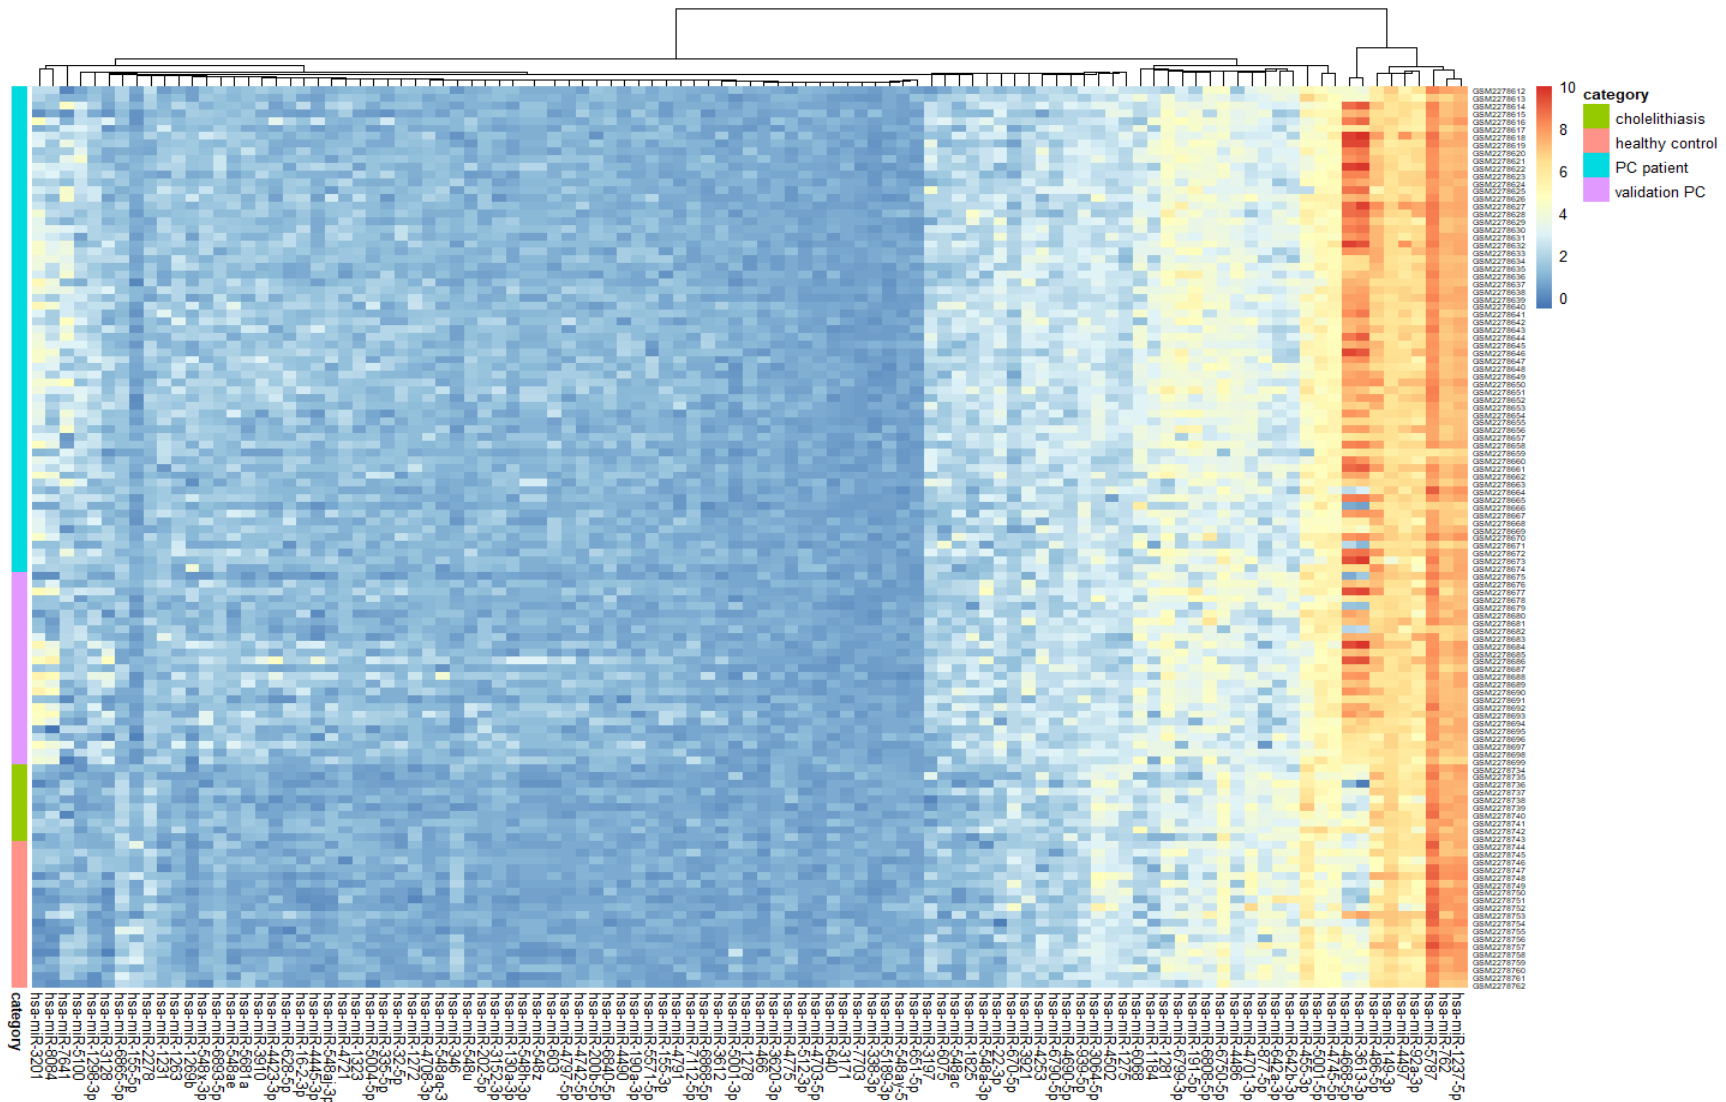

Figure S1. The heatmap of 103 miRNAs for distinguishing PC and non-cancer samples.



**Table S1.** The differentially expressed 103 miRNAs for distinguishing PC and non-cancer samples.

| miRNA             | Z-value | p-val    | FDR      | AUC      |
|-------------------|---------|----------|----------|----------|
| hsa-miR-4668-5p*  | -5.060  | 4.19E-07 | 0.000584 | 0.910783 |
| hsa-miR-3613-3p*  | -5.045  | 4.53E-07 | 0.000584 | 0.903667 |
| hsa-miR-548ac*    | -4.610  | 4.02E-06 | 0.002278 | 0.90312  |
| hsa-miR-1298-3p*  | -4.604  | 4.15E-06 | 0.002278 | 0.906951 |
| hsa-miR-16-2-3p*  | -4.580  | 4.66E-06 | 0.002278 | 0.86809  |
| hsa-miR-4708-3p*  | -4.553  | 5.30E-06 | 0.002278 | 0.873563 |
| hsa-miR-548a-3p*  | -4.467  | 7.93E-06 | 0.002919 | 0.835249 |
| hsa-miR-3201*     | -4.418  | 9.97E-06 | 0.003155 | 0.925014 |
| hsa-miR-8084*     | -4.397  | 1.10E-05 | 0.003155 | 0.86809  |
| hsa-miR-548aq-3p* | -4.321  | 1.55E-05 | 0.003244 | 0.834702 |
| hsa-miR-628-5p*   | -4.264  | 2.01E-05 | 0.003244 | 0.847291 |
| hsa-miR-455-3p*   | 4.262   | 2.03E-05 | 0.003244 | 0.836891 |
| hsa-miR-548h-3p*  | -4.248  | 2.16E-05 | 0.003244 | 0.834154 |
| hsa-miR-548z*     | -4.248  | 2.16E-05 | 0.003244 | 0.834154 |
| hsa-miR-32-5p*    | -4.243  | 2.21E-05 | 0.003244 | 0.831418 |
| hsa-miR-22-3p*    | -4.240  | 2.24E-05 | 0.003244 | 0.819923 |
| hsa-miR-1269b*    | -4.227  | 2.37E-05 | 0.003244 | 0.904762 |
| hsa-miR-346*      | 4.225   | 2.39E-05 | 0.003244 | 0.793651 |
| hsa-miR-3910*     | -4.225  | 2.39E-05 | 0.003244 | 0.843459 |
| hsa-miR-4797-5p*  | -4.209  | 2.57E-05 | 0.003244 | 0.853859 |
| hsa-miR-1263*     | -4.202  | 2.64E-05 | 0.003244 | 0.837438 |
| hsa-miR-548ae*    | -4.133  | 3.58E-05 | 0.004194 | 0.840175 |
| hsa-miR-642a-3p*  | 4.099   | 4.15E-05 | 0.004475 | 0.800766 |
| hsa-miR-1184*     | -4.096  | 4.20E-05 | 0.004475 | 0.808976 |
| hsa-miR-1825*     | -4.089  | 4.34E-05 | 0.004475 | 0.81445  |
| hsa-miR-762*      | 4.042   | 5.31E-05 | 0.005055 | 0.760263 |
| hsa-miR-5100*     | -4.038  | 5.39E-05 | 0.005055 | 0.792009 |
| hsa-miR-335-5p*   | -4.030  | 5.58E-05 | 0.005055 | 0.834702 |
| hsa-miR-548aj-3p* | -4.025  | 5.69E-05 | 0.005055 | 0.789272 |
| hsa-miR-1272*     | -3.993  | 6.52E-05 | 0.005605 | 0.793103 |
| hsa-miR-486-5p*   | -3.976  | 7.01E-05 | 0.005753 | 0.781609 |
| hsa-miR-642b-3p*  | 3.972   | 7.14E-05 | 0.005753 | 0.789819 |
| hsa-miR-6865-5p*  | 3.919   | 8.90E-05 | 0.006797 | 0.776136 |
| hsa-miR-4423-3p*  | -3.912  | 9.15E-05 | 0.006797 | 0.80405  |
| hsa-miR-3128*     | -3.910  | 9.23E-05 | 0.006797 | 0.80624  |
| hsa-miR-548x-3p*  | -3.886  | 0.000102 | 0.007318 | 0.812808 |
| hsa-miR-1281*     | -3.879  | 0.000105 | 0.007318 | 0.798577 |
| hsa-miR-603*      | -3.872  | 0.000108 | 0.007344 | 0.793651 |

|                   |        |          |          |          |
|-------------------|--------|----------|----------|----------|
| hsa-miR-4486*     | -3.859 | 0.000114 | 0.007516 | 0.788725 |
| hsa-miR-548u*     | -3.844 | 0.000121 | 0.007652 | 0.77723  |
| hsa-miR-640*      | 3.842  | 0.000122 | 0.007652 | 0.746579 |
| hsa-miR-4742-5p*  | -3.828 | 0.000129 | 0.007943 | 0.791461 |
| hsa-miR-3152-3p*  | -3.810 | 0.000139 | 0.008337 | 0.782157 |
| hsa-miR-1323*     | -3.793 | 0.000149 | 0.008618 | 0.772852 |
| hsa-miR-5787*     | 3.791  | 0.00015  | 0.008618 | 0.755884 |
| hsa-miR-6068*     | -3.758 | 0.000171 | 0.009597 | 0.77723  |
| hsa-miR-6840-5p   | -3.751 | 0.000176 | 0.009669 | 0.786535 |
| hsa-miR-6750-5p*  | 3.729  | 0.000192 | 0.010302 | 0.785441 |
| hsa-miR-5681a*    | -3.713 | 0.000205 | 0.010634 | 0.765736 |
| hsa-miR-548ay-5p* | 3.712  | 0.000206 | 0.010634 | 0.773946 |
| hsa-miR-6075*     | -3.702 | 0.000214 | 0.010841 | 0.762452 |
| hsa-miR-4502      | 3.679  | 0.000234 | 0.011623 | 0.756979 |
| hsa-miR-3064-5p*  | 3.614  | 0.000301 | 0.014624 | 0.768473 |
| hsa-miR-5001-5p*  | -3.604 | 0.000313 | 0.014935 | 0.775588 |
| hsa-miR-155-3p*   | -3.593 | 0.000327 | 0.01525  | 0.770115 |
| hsa-miR-155-5p*   | 3.590  | 0.000331 | 0.01525  | 0.843459 |
| hsa-miR-1237-5p*  | 3.569  | 0.000358 | 0.016206 | 0.733443 |
| hsa-miR-7641*     | -3.547 | 0.00039  | 0.017356 | 0.759715 |
| hsa-miR-5004-5p*  | -3.542 | 0.000397 | 0.017365 | 0.764641 |
| hsa-miR-4690-5p*  | -3.496 | 0.000472 | 0.020262 | 0.747674 |
| hsa-miR-4497*     | -3.492 | 0.00048  | 0.020293 | 0.74439  |
| hsa-miR-4745-5p*  | -3.458 | 0.000545 | 0.022645 | 0.721949 |
| hsa-miR-4703-5p*  | -3.429 | 0.000606 | 0.024817 | 0.725233 |
| hsa-miR-5189-3p*  | 3.414  | 0.00064  | 0.025762 | 0.722496 |
| hsa-miR-512-3p*   | -3.392 | 0.000693 | 0.02687  | 0.737274 |
| hsa-miR-939-5p*   | -3.391 | 0.000696 | 0.02687  | 0.720854 |
| hsa-miR-4445-3p*  | -3.390 | 0.000698 | 0.02687  | 0.759715 |
| hsa-miR-2278*     | 3.364  | 0.000768 | 0.029108 | 0.718664 |
| hsa-miR-1231*     | -3.352 | 0.000802 | 0.02994  | 0.728517 |
| hsa-miR-3612*     | -3.348 | 0.000813 | 0.02994  | 0.735085 |
| hsa-miR-6790-5p*  | -3.338 | 0.000844 | 0.030633 | 0.726327 |
| hsa-miR-877-5p*   | 3.330  | 0.00087  | 0.031163 | 0.739464 |
| hsa-miR-6808-5p   | -3.319 | 0.000904 | 0.03193  | 0.747674 |
| hsa-miR-3620-3p*  | 3.315  | 0.000917 | 0.031947 | 0.723043 |
| hsa-miR-6893-5p   | -3.311 | 0.000931 | 0.032001 | 0.721401 |
| hsa-miR-1275      | 3.299  | 0.000971 | 0.032941 | 0.689655 |
| hsa-miR-466*      | -3.293 | 0.00099  | 0.033141 | 0.738369 |
| hsa-miR-190a-3p*  | -3.267 | 0.001087 | 0.035934 | 0.723591 |
| hsa-miR-200b-5p*  | -3.262 | 0.001107 | 0.036111 | 0.727969 |

|                  |        |          |          |          |
|------------------|--------|----------|----------|----------|
| hsa-miR-4721*    | -3.253 | 0.001143 | 0.036836 | 0.755884 |
| hsa-miR-4490*    | -3.242 | 0.001187 | 0.037766 | 0.7526   |
| hsa-miR-3197     | -3.238 | 0.001203 | 0.037824 | 0.721401 |
| hsa-miR-191-5p*  | -3.222 | 0.001275 | 0.039517 | 0.76902  |
| hsa-miR-3171     | 3.218  | 0.001293 | 0.039517 | 0.719212 |
| hsa-miR-92a-3p   | -3.213 | 0.001315 | 0.039517 | 0.712096 |
| hsa-miR-651-5p   | 3.212  | 0.001318 | 0.039517 | 0.732895 |
| hsa-miR-5571-5p  | -3.206 | 0.001344 | 0.039694 | 0.724685 |
| hsa-miR-6799-3p* | -3.201 | 0.001369 | 0.039694 | 0.70717  |
| hsa-miR-202-5p*  | -3.201 | 0.00137  | 0.039694 | 0.730159 |
| hsa-miR-149-3p*  | 3.192  | 0.001413 | 0.040478 | 0.718664 |
| hsa-miR-670-5p*  | 3.182  | 0.001462 | 0.041422 | 0.71538  |
| hsa-miR-5001-3p  | 3.178  | 0.001483 | 0.041543 | 0.732895 |
| hsa-miR-130a-3p* | -3.171 | 0.001521 | 0.042071 | 0.711549 |
| hsa-miR-7703*    | 3.168  | 0.001534 | 0.042071 | 0.68254  |
| hsa-miR-3921     | -3.162 | 0.001565 | 0.042228 | 0.73399  |
| hsa-miR-4791     | -3.161 | 0.001573 | 0.042228 | 0.723043 |
| hsa-miR-338-3p   | 3.156  | 0.001601 | 0.042553 | 0.702791 |
| hsa-miR-4253*    | -3.147 | 0.00165  | 0.043398 | 0.713738 |
| hsa-miR-6868-5p  | -3.125 | 0.00178  | 0.046361 | 0.738369 |
| hsa-miR-7112-5p  | -3.120 | 0.001811 | 0.046697 | 0.747674 |
| hsa-miR-4701-3p* | 3.102  | 0.001922 | 0.048675 | 0.701149 |
| hsa-miR-1278     | -3.101 | 0.001926 | 0.048675 | 0.720307 |
| hsa-miR-4775*    | 3.098  | 0.001948 | 0.048758 | 0.70717  |

\*the markers that were also differentially expressed between PC and non-PC samples; other markers were only differentially expressed between PC and non-cancer samples.

**Table S2.** The differentially expressed 149 miRNAs for distinguishing PC and non-PC samples.

| miRNA             | Z-value | p-val    | FDR      | AUC      |
|-------------------|---------|----------|----------|----------|
| hsa-miR-3201*     | -5.827  | 5.63E-09 | 1.45E-05 | 0.867977 |
| hsa-miR-3613-3p*  | -5.707  | 1.15E-08 | 1.49E-05 | 0.825901 |
| hsa-miR-4668-5p*  | -5.585  | 2.34E-08 | 2.01E-05 | 0.823381 |
| hsa-miR-548ac*    | -5.452  | 4.98E-08 | 3.21E-05 | 0.847317 |
| hsa-miR-1269b*    | -5.261  | 1.43E-07 | 7.35E-05 | 0.85941  |
| hsa-miR-8084*     | -5.152  | 2.58E-07 | 0.000111 | 0.813555 |
| hsa-miR-548a-3p*  | -5.105  | 3.30E-07 | 0.000122 | 0.794911 |
| hsa-miR-16-2-3p*  | -5.032  | 4.85E-07 | 0.00015  | 0.801209 |
| hsa-miR-1263*     | -5.008  | 5.51E-07 | 0.00015  | 0.789872 |
| hsa-miR-22-3p*    | -4.994  | 5.91E-07 | 0.00015  | 0.787352 |
| hsa-miR-5100*     | -4.979  | 6.39E-07 | 0.00015  | 0.776266 |
| hsa-miR-4708-3p*  | -4.928  | 8.30E-07 | 0.000178 | 0.834215 |
| hsa-miR-6865-5p*  | 4.864   | 1.15E-06 | 0.000198 | 0.77425  |
| hsa-miR-1298-3p*  | -4.864  | 1.15E-06 | 0.000198 | 0.797682 |
| hsa-miR-642b-3p*  | 4.864   | 1.15E-06 | 0.000198 | 0.78962  |
| hsa-miR-642a-3p*  | 4.786   | 1.70E-06 | 0.000274 | 0.78584  |
| hsa-miR-3910*     | -4.745  | 2.09E-06 | 0.000316 | 0.77551  |
| hsa-miR-4486*     | -4.692  | 2.70E-06 | 0.000387 | 0.774502 |
| hsa-miR-548aq-3p* | -4.661  | 3.15E-06 | 0.000387 | 0.773998 |
| hsa-miR-548ay-5p* | 4.657   | 3.21E-06 | 0.000387 | 0.768204 |
| hsa-miR-155-5p*   | 4.647   | 3.37E-06 | 0.000387 | 0.817334 |
| hsa-miR-335-5p*   | -4.646  | 3.38E-06 | 0.000387 | 0.78962  |
| hsa-miR-3128*     | -4.642  | 3.45E-06 | 0.000387 | 0.772235 |
| hsa-miR-3064-5p*  | 4.589   | 4.45E-06 | 0.000478 | 0.778786 |
| hsa-miR-548ae*    | -4.580  | 4.64E-06 | 0.000478 | 0.786596 |
| hsa-miR-548u*     | -4.537  | 5.70E-06 | 0.000565 | 0.750063 |
| hsa-miR-6750-5p*  | 4.528   | 5.96E-06 | 0.000569 | 0.772235 |
| hsa-miR-346*      | 4.516   | 6.31E-06 | 0.000581 | 0.737969 |
| hsa-miR-4797-5p*  | -4.475  | 7.63E-06 | 0.000678 | 0.769967 |
| hsa-miR-32-5p*    | -4.379  | 1.19E-05 | 0.00102  | 0.758125 |
| hsa-miR-1323*     | -4.336  | 1.45E-05 | 0.001206 | 0.741749 |
| hsa-miR-4742-5p*  | -4.291  | 1.78E-05 | 0.001434 | 0.755102 |
| hsa-miR-877-5p*   | 4.280   | 1.87E-05 | 0.001453 | 0.732678 |
| hsa-miR-628-5p*   | -4.274  | 1.92E-05 | 0.001453 | 0.771227 |
| hsa-miR-127-3p    | -4.241  | 2.23E-05 | 0.001646 | 0.743512 |
| hsa-miR-3152-3p*  | -4.209  | 2.57E-05 | 0.001841 | 0.737717 |
| hsa-miR-4423-3p*  | -4.191  | 2.78E-05 | 0.00191  | 0.730411 |
| hsa-miR-4690-5p*  | -4.188  | 2.82E-05 | 0.00191  | 0.737969 |
| hsa-miR-548aj-3p* | -4.140  | 3.47E-05 | 0.002223 | 0.72386  |

|                  |        |          |          |          |
|------------------|--------|----------|----------|----------|
| hsa-miR-640*     | 4.138  | 3.50E-05 | 0.002223 | 0.721088 |
| hsa-miR-2278*    | 4.136  | 3.54E-05 | 0.002223 | 0.727891 |
| hsa-miR-6075*    | -4.105 | 4.04E-05 | 0.00248  | 0.731922 |
| hsa-miR-4701-3p* | 4.092  | 4.27E-05 | 0.00256  | 0.721844 |
| hsa-miR-1272*    | -4.057 | 4.97E-05 | 0.002912 | 0.755102 |
| hsa-miR-455-3p*  | 4.050  | 5.13E-05 | 0.002938 | 0.732174 |
| hsa-miR-5787*    | 4.041  | 5.33E-05 | 0.002988 | 0.719829 |
| hsa-miR-200b-5p* | -4.033 | 5.50E-05 | 0.003017 | 0.719073 |
| hsa-miR-7641*    | -3.992 | 6.54E-05 | 0.003464 | 0.714286 |
| hsa-miR-6511b-5p | 3.991  | 6.58E-05 | 0.003464 | 0.730915 |
| hsa-miR-4741     | -3.982 | 6.84E-05 | 0.003526 | 0.703704 |
| hsa-miR-155-3p*  | -3.974 | 7.08E-05 | 0.003531 | 0.716049 |
| hsa-miR-6068*    | -3.972 | 7.12E-05 | 0.003531 | 0.720585 |
| hsa-miR-4647     | 3.950  | 7.80E-05 | 0.003793 | 0.734694 |
| hsa-miR-191-5p*  | -3.946 | 7.96E-05 | 0.003801 | 0.74704  |
| hsa-miR-548h-3p* | -3.929 | 8.54E-05 | 0.003933 | 0.753842 |
| hsa-miR-548z*    | -3.929 | 8.54E-05 | 0.003933 | 0.753842 |
| hsa-miR-939-5p*  | -3.919 | 8.90E-05 | 0.004027 | 0.707735 |
| hsa-miR-4284     | -3.909 | 9.28E-05 | 0.004035 | 0.710254 |
| hsa-miR-4745-5p* | -3.908 | 9.31E-05 | 0.004035 | 0.707735 |
| hsa-miR-8075     | 3.906  | 9.39E-05 | 0.004035 | 0.720081 |
| hsa-miR-1281*    | -3.865 | 0.000111 | 0.004701 | 0.73293  |
| hsa-miR-5681a*   | -3.832 | 0.000127 | 0.005283 | 0.705467 |
| hsa-miR-6894-3p  | 3.823  | 0.000132 | 0.005388 | 0.699169 |
| hsa-miR-5189-3p* | 3.803  | 0.000143 | 0.005744 | 0.702192 |
| hsa-miR-548x-3p* | -3.773 | 0.000161 | 0.006376 | 0.739985 |
| hsa-miR-486-5p*  | -3.761 | 0.000169 | 0.006517 | 0.706727 |
| hsa-miR-7154-5p  | 3.761  | 0.000169 | 0.006517 | 0.707735 |
| hsa-miR-6799-3p* | -3.741 | 0.000183 | 0.00695  | 0.698665 |
| hsa-miR-450b-5p  | -3.728 | 0.000193 | 0.007198 | 0.697153 |
| hsa-miR-4775*    | 3.696  | 0.000219 | 0.008078 | 0.703956 |
| hsa-miR-661      | 3.690  | 0.000224 | 0.008147 | 0.697657 |
| hsa-miR-1184*    | -3.666 | 0.000246 | 0.008699 | 0.709247 |
| hsa-miR-7855-5p  | 3.666  | 0.000246 | 0.008699 | 0.698665 |
| hsa-miR-6506-5p  | -3.657 | 0.000255 | 0.008881 | 0.690854 |
| hsa-miR-221-5p   | -3.653 | 0.000259 | 0.008891 | 0.699924 |
| hsa-miR-6751-5p  | 3.640  | 0.000273 | 0.009275 | 0.689594 |
| hsa-miR-4721*    | -3.633 | 0.00028  | 0.009275 | 0.715294 |
| hsa-miR-3620-3p* | 3.632  | 0.000281 | 0.009275 | 0.697153 |
| hsa-miR-3942-5p  | -3.599 | 0.000319 | 0.01042  | 0.693878 |
| hsa-miR-202-5p*  | -3.595 | 0.000325 | 0.010459 | 0.704712 |

|                  |        |          |          |          |
|------------------|--------|----------|----------|----------|
| hsa-miR-7852-3p  | -3.585 | 0.000337 | 0.010717 | 0.683799 |
| hsa-miR-1237-5p* | 3.566  | 0.000363 | 0.011406 | 0.705971 |
| hsa-miR-26a-5p   | -3.554 | 0.000379 | 0.011782 | 0.696649 |
| hsa-miR-4445-3p* | -3.542 | 0.000397 | 0.012171 | 0.706475 |
| hsa-miR-503-5p   | 3.538  | 0.000403 | 0.012222 | 0.713278 |
| hsa-miR-670-5p*  | 3.535  | 0.000408 | 0.012222 | 0.678256 |
| hsa-miR-5004-5p* | -3.509 | 0.00045  | 0.013204 | 0.679768 |
| hsa-miR-6800-5p  | -3.508 | 0.000451 | 0.013204 | 0.68254  |
| hsa-miR-1825*    | -3.469 | 0.000523 | 0.015107 | 0.756866 |
| hsa-miR-595      | 3.464  | 0.000533 | 0.015107 | 0.677501 |
| hsa-miR-6780a-5p | 3.464  | 0.000533 | 0.015107 | 0.683547 |
| hsa-miR-149-3p*  | 3.428  | 0.000609 | 0.016975 | 0.692618 |
| hsa-miR-425-5p   | -3.426 | 0.000612 | 0.016975 | 0.678508 |
| hsa-miR-2467-3p  | -3.400 | 0.000675 | 0.018521 | 0.672965 |
| hsa-miR-6737-3p  | -3.388 | 0.000705 | 0.019122 | 0.684303 |
| hsa-miR-4767     | -3.373 | 0.000744 | 0.019716 | 0.672714 |
| hsa-miR-4497*    | -3.373 | 0.000744 | 0.019716 | 0.668934 |
| hsa-miR-6849-5p  | 3.371  | 0.000749 | 0.019716 | 0.683799 |
| hsa-miR-6732-5p  | 3.338  | 0.000845 | 0.021902 | 0.669186 |
| hsa-miR-4454     | -3.336 | 0.00085  | 0.021902 | 0.683044 |
| hsa-let-7b-5p    | 3.319  | 0.000902 | 0.02303  | 0.674729 |
| hsa-miR-4703-5p* | -3.301 | 0.000964 | 0.024212 | 0.664147 |
| hsa-miR-4487     | 3.300  | 0.000967 | 0.024212 | 0.690854 |
| hsa-miR-3149     | 3.295  | 0.000983 | 0.024376 | 0.681028 |
| hsa-miR-762*     | 3.291  | 0.000998 | 0.024502 | 0.69035  |
| hsa-miR-1277-3p  | -3.287 | 0.001011 | 0.024577 | 0.678005 |
| hsa-miR-6856-5p  | 3.283  | 0.001027 | 0.024744 | 0.704963 |
| hsa-miR-1226-5p  | -3.269 | 0.001081 | 0.025806 | 0.68002  |
| hsa-miR-4490*    | -3.258 | 0.001123 | 0.026571 | 0.669186 |
| hsa-miR-5692a    | 3.244  | 0.001177 | 0.027429 | 0.679516 |
| hsa-miR-512-3p*  | -3.241 | 0.001191 | 0.027429 | 0.671706 |
| hsa-miR-218-5p   | 3.241  | 0.001192 | 0.027429 | 0.67095  |
| hsa-miR-1260a    | 3.233  | 0.001224 | 0.027452 | 0.657092 |
| hsa-miR-4799-3p  | -3.233 | 0.001226 | 0.027452 | 0.676745 |
| hsa-miR-603*     | -3.231 | 0.001234 | 0.027452 | 0.688335 |
| hsa-miR-7847-3p  | -3.231 | 0.001235 | 0.027452 | 0.670446 |
| hsa-miR-1231*    | -3.221 | 0.001278 | 0.028163 | 0.652053 |
| hsa-miR-6756-5p  | 3.191  | 0.001419 | 0.031    | 0.686571 |
| hsa-miR-4674     | -3.185 | 0.001446 | 0.031132 | 0.662383 |
| hsa-miR-891b     | -3.185 | 0.001449 | 0.031132 | 0.671202 |
| hsa-miR-572      | -3.176 | 0.001491 | 0.031771 | 0.671202 |



|                  |        |          |          |          |
|------------------|--------|----------|----------|----------|
| hsa-miR-466*     | -3.164 | 0.001557 | 0.032892 | 0.67221  |
| hsa-miR-6814-5p  | -3.155 | 0.001603 | 0.033592 | 0.67095  |
| hsa-miR-3612*    | -3.152 | 0.001621 | 0.033705 | 0.668934 |
| hsa-miR-20a-3p   | -3.149 | 0.00164  | 0.033829 | 0.657848 |
| hsa-miR-377-5p   | 3.141  | 0.001686 | 0.034506 | 0.670446 |
| hsa-miR-4253*    | -3.127 | 0.001764 | 0.035804 | 0.666415 |
| hsa-miR-6827-5p  | -3.107 | 0.001889 | 0.037573 | 0.650038 |
| hsa-miR-3143     | 3.107  | 0.001893 | 0.037573 | 0.670194 |
| hsa-miR-5001-5p* | -3.106 | 0.001895 | 0.037573 | 0.676241 |
| hsa-miR-4722-3p  | 3.102  | 0.001925 | 0.037892 | 0.666163 |
| hsa-miR-4769-5p  | 3.090  | 0.002003 | 0.03912  | 0.657596 |
| hsa-miR-6741-5p  | 3.082  | 0.002059 | 0.039863 | 0.670698 |
| hsa-miR-6796-5p  | -3.080 | 0.002072 | 0.039863 | 0.65936  |
| hsa-miR-6807-5p  | -3.076 | 0.002095 | 0.040014 | 0.671202 |
| hsa-miR-770-5p   | 3.073  | 0.00212  | 0.040192 | 0.672965 |
| hsa-miR-190a-3p* | -3.061 | 0.002203 | 0.041014 | 0.675485 |
| hsa-miR-4706     | 3.061  | 0.002207 | 0.041014 | 0.645251 |
| hsa-miR-6503-5p  | 3.060  | 0.002211 | 0.041014 | 0.655581 |
| hsa-miR-5093     | -3.054 | 0.002255 | 0.041516 | 0.650542 |
| hsa-miR-6790-5p* | -3.051 | 0.002281 | 0.041705 | 0.662383 |
| hsa-miR-7703*    | 3.042  | 0.002347 | 0.042603 | 0.650542 |
| hsa-miR-130a-3p* | -3.006 | 0.00265  | 0.047444 | 0.64777  |
| hsa-miR-8071     | -3.002 | 0.002681 | 0.047444 | 0.679768 |
| hsa-miR-2110     | 3.001  | 0.002689 | 0.047444 | 0.656085 |
| hsa-miR-4482-3p  | 3.000  | 0.002697 | 0.047444 | 0.660368 |
| hsa-miR-6751-3p  | 2.999  | 0.002705 | 0.047444 | 0.650038 |
| hsa-miR-606      | -2.997 | 0.002728 | 0.04752  | 0.661628 |
| hsa-miR-423-5p   | -2.993 | 0.002759 | 0.047741 | 0.656337 |

\*the markers that were also differentially expressed between PC and non-cancer samples; other markers were only differentially expressed between PC and non-PC samples.

**Table S3.** Clinical characteristic of the samples used for qRT-PCR.

| Variables                | qRT-PCR      |              |            |
|--------------------------|--------------|--------------|------------|
|                          | PC<br>(n=17) | ICC<br>(n=8) | N<br>(n=8) |
| Age                      | 65.0 ± 11.4  | 63.0 ± 8.2   | 44.0 ± 9.4 |
| Female                   | 10 (58.8)    | 3 (37.5)     | 2 (25.0)   |
| Stage*                   |              |              |            |
| I                        | 2            | 2            |            |
| II                       | 7            | 1            |            |
| III                      | -            | 1            |            |
| IV                       | 8            | 4            |            |
| CA19-9, U/ml             | 698±6505.3   | 93.9±1590.1  | 6.6±7.44   |
| ≤37                      | 4 (23.5)     | 3(37.5)      | 8(100)     |
| >37                      | 13 (76.5)    | 5 (62.5)     | -          |
| Overall Survival, months | 21.7         | 15.3         | -          |

\* Tumor stages were based on the staging classification of the 7th edition of the American Joint Committee on Cancer.

Variables are expressed as mean±standard deviation, median±standard deviation, or n(%)

PC (pancreatic cancer), ICC (intrahepatic cholangiocarcinoma), N (normal), CA 19-9 (carbohydrate antigen 19-9)
